# Supplementary material
Source: publisher site journal article supplement (https://static.cambridge.org/content/id/urn:cambridge.org:id:article:S136898002000292X/resource/name/S136898002000292Xsupp001.pdf)
Supplement: Supplementary file 1 [file S136898002000292Xsupp001.pdf]

Appendix 2. Latin American and Food Security Scale (ELCSA) cut-off values to classify households into a Household Food Insecurity (HFI) category

|                                                              | <b>HFI category</b> |                             |                                 |                               |
|--------------------------------------------------------------|---------------------|-----------------------------|---------------------------------|-------------------------------|
|                                                              | <b>Security</b>     | <b>Mild food insecurity</b> | <b>Moderate food insecurity</b> | <b>Severe food insecurity</b> |
| <i>Household composition</i><br>(Number of positive answers) |                     |                             |                                 |                               |
| Households with no members under 18 years of age             | 0                   | 1 to 3                      | 4 to 6                          | 7 to 8                        |
| Households with members under 18 years of age<br>(Number     | 0                   | 1 to 5                      | 6 to 10                         | 11 to 15                      |

Source: Committee, E. S. (2012). Escala Latinoamericana y Caribeña de Seguridad Alimentaria (ELCSA). Manual de uso y aplicaciones. Rome, Food and Agriculture Organization of the United Nations.
